# Supplementary material for: Exploring the role of different data types and timescales in the quality of marine biogeochemical model calibration
Source: Copernicus journal article supplement (doi:10.5194/bg-20-2645-2023), 2023-07-06
Supplement: Supplementary file 2 [file bg-20-2645-2023-supplement.pdf]

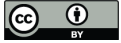

*Supplement of*

## **Exploring the role of different data types and timescales in the quality of marine biogeochemical model calibration**

**Iris Kriest et al.**

*Correspondence to:* Iris Kriest (ikriest@geomar.de)

The copyright of individual parts of the supplement might differ from the article licence.

**Table S1.** As Table 2, but including results of an optimisation S4-DOP that is similar to S4-SO, but includes all phytoplankton data including the Southern Ocean.

|                        | S6*-All                  | S6-All                   | S6-DOP                   | S4-DOP                   | S4-SO                    | S4-Org                   | L4-SO                    | ECCO* |
|------------------------|--------------------------|--------------------------|--------------------------|--------------------------|--------------------------|--------------------------|--------------------------|-------|
| $L$                    | 140                      | 138                      | 349                      | 64                       | 87                       | 115                      | 39                       | -     |
| $J_{\text{RMSE}}$      | 6.030                    | 6.052                    | 6.082                    | 6.045                    | 6.046                    | 6.874                    | 6.125                    | 7.072 |
| Optimal parameters:    |                          |                          |                          |                          |                          |                          |                          |       |
| $I_c$                  | 34.44<br>[ 31.4- 37.4]   | 33.98<br>[ 31.5- 35.0]   | 31.57<br>[ 28.3- 34.7]   | 28.46<br>[ 26.4- 32.5]   | 28.84<br>[ 26.0- 31.8]   | 38.38<br>[ 32.4- 39.9]   | 22.11<br>[ 17.2- 25.2]   | 9.65  |
| $\mu_{\text{ZOO}}$     | 2.801<br>[ 2.63- 2.87]   | 2.594<br>[ 2.45- 2.72]   | 2.895<br>[ 2.63- 3.00]   | 2.967<br>[ 2.68- 3.00]   | 2.807<br>[ 2.44- 3.00]   | 1.021<br>[ 1.00- 1.33]   | 2.369<br>[ 2.10- 2.79]   | 1.893 |
| $R_{-O_2:P}$           | 187.8<br>[ 185.9- 193.6] | 188.3<br>[ 181.3- 190.4] | 200.0<br>[ 194.0- 200.0] | 199.5<br>[ 185.4- 200.0] | 200.0<br>[ 184.9- 200.0] | 189.5<br>[ 180.0- 190.6] | 169.3<br>[ 161.8- 175.9] | 151.1 |
| $b$                    | 0.803<br>[ 0.77- 0.83]   | 1.000<br>[ 1.00- 1.02]   | 1.000<br>[ 1.00- 1.04]   | 1.000<br>[ 1.00- 1.03]   | 1.000<br>[ 1.00- 1.03]   | 1.800<br>[ 1.78- 1.80]   | 1.024<br>[ 1.00- 1.09]   | 1.461 |
| $\sigma_{\text{DOP}}$  | 0.028<br>[ 0.02- 0.07]   | 0.000<br>[ 0.00- 0.00]   | 0.049<br>[ 0.00- 0.07]   | 0.000<br>[ 0.00- 0.07]   | 0.000<br>[ 0.00- 0.07]   | 0.000<br>[ 0.00- 0.07]   | 0.000<br>[ 0.00- 0.07]   | 0.150 |
| $\lambda_{\text{DOP}}$ | 0.238<br>[ 0.20- 0.34]   | 0.184<br>[ 0.15- 0.22]   | 0.168<br>[ 0.12- 0.24]   | 0.184<br>[ 0.12- 0.24]   | 0.184<br>[ 0.12- 0.24]   | 0.184<br>[ 0.12- 0.24]   | 0.184<br>[ 0.12- 0.24]   | 0.170 |

**Table S2.** Surface  $J_{\text{RMSE}}$  (Equation 1 and bias of optimised models after 10 years of simulation. For all tracers we present the value for ECCO\* and the minimum and maximum value of S6\*-All to L4-SO. Bias is in  $\text{mmol m}^{-3}$  for nutrients and oxygen, and in  $\mu\text{mol P m}^{-3}$  for other components.

|                                       | PO <sub>4</sub> | NO <sub>3</sub> | O <sub>2</sub> | Phy    | Zoo   | POP    | DOP     |
|---------------------------------------|-----------------|-----------------|----------------|--------|-------|--------|---------|
| $J_{\text{RMSE}}$ , 10 year spin-up   |                 |                 |                |        |       |        |         |
| ECCO*                                 | 0.492           | 0.615           | 0.077          | 0.826  | 1.830 | 1.665  | 1.567   |
| Minimum                               | 0.254           | 0.303           | 0.058          | 0.756  | 1.720 | 1.678  | 1.172   |
| % of ECCO*                            | 51.7            | 49.3            | 75.3           | 91.6   | 94.0  | 100.7  | 74.8    |
| Maximum                               | 0.310           | 0.355           | 0.062          | 1.332  | 1.854 | 1.765  | 1.304   |
| % of ECCO*                            | 63.0            | 57.6            | 80.1           | 161.3  | 101.3 | 106.0  | 83.2    |
| $J_{\text{RMSE}}$ , 3000 year spin-up |                 |                 |                |        |       |        |         |
| ECCO*                                 | 0.579           | 0.612           | 0.069          | 0.855  | 1.878 | 1.674  | 2.292   |
| Minimum                               | 0.319           | 0.362           | 0.060          | 0.754  | 1.694 | 1.691  | 1.183   |
| % of ECCO*                            | 55.0            | 59.1            | 86.8           | 88.2   | 90.2  | 101.0  | 51.6    |
| Maximum                               | 0.490           | 0.453           | 0.080          | 1.515  | 1.942 | 1.834  | 1.767   |
| % of ECCO*                            | 84.5            | 74.1            | 116.4          | 177.2  | 103.4 | 109.5  | 77.1    |
| Bias, 10 year spin-up                 |                 |                 |                |        |       |        |         |
| ECCO*                                 | 0.229           | 2.599           | 4.616          | 2.960  | 2.100 | 13.490 | 170.850 |
| Minimum                               | 0.044           | 0.083           | 0.434          | 0.120  | 0.020 | 9.210  | 4.690   |
| % of ECCO*                            | 19.3            | 3.2             | 9.4            | 4.1    | 1.0   | 68.3   | 2.7     |
| Maximum                               | 0.106           | 0.809           | 2.086          | 14.620 | 0.660 | 16.430 | 94.850  |
| % of ECCO*                            | 46.2            | 31.1            | 45.2           | 493.9  | 31.4  | 121.8  | 55.5    |
| Bias, 3000 year spin-up               |                 |                 |                |        |       |        |         |
| ECCO*                                 | 0.274           | 2.359           | 2.579          | 4.880  | 2.910 | 12.740 | 348.160 |
| Minimum                               | 0.063           | 0.322           | 0.064          | 0.070  | 0.200 | 6.680  | 5.790   |
| % of ECCO*                            | 23.0            | 13.7            | 2.5            | 1.4    | 6.9   | 52.4   | 1.7     |
| Maximum                               | 0.214           | 1.315           | 4.967          | 18.980 | 1.360 | 17.720 | 229.930 |
| % of ECCO*                            | 78.3            | 55.7            | 192.6          | 388.9  | 46.7  | 139.1  | 66.0    |

**Table S3.** Correlation coefficient  $r$ , RMSE, standard deviation bias normalised by observed standard deviation ( $\sigma_m/\sigma_o$ ), bias and relative bias (normalised by observed mean) of model simulations after a spin up of 3000 years in comparison to metrics reported by Ilyina et al. (2013, Table 5; range over two different circulations, surface and 100m), Seferian et al. (2013, Table 3; range over three different circulations) and Kwiatkowski et al. (2014, Table 3; range over six biogeochemical models). Note that all metrics of the present study have been calculated from volume-weighted properties in the upper 100 m, whereas the other studies mostly report “surface” data, or discrete levels in the upper 100m. Also, the method for metric computation (area- or volume weighting; data sets used from comparison) might differ in the other studies.  
\*: Value for S4-Org.

| Source:             |                 | Ilyina et al. (2013) | Seferian et al. (2013) | Kwiatkowski et al. (2014) | This study |                                |
|---------------------|-----------------|----------------------|------------------------|---------------------------|------------|--------------------------------|
| Experiments:        |                 | 2 circulations       | 3 circulations         | 6 BGC models              | ECCO*      | 1 circulation, 6 optimisations |
| Spin up length (y): |                 | O(1000)              | O(1000)                | O(100)                    | 3000       | 3000                           |
| Metric              | Tracer          |                      |                        |                           |            |                                |
| $r$                 | PO <sub>4</sub> | 0.91-0.95            | 0.85-0.91              | -                         | 0.91       | 0.93-0.95*                     |
|                     | NO <sub>3</sub> | 0.87-0.93            | 0.87-0.94              | 0.79-0.94                 | 0.92       | 0.95-0.96*                     |
|                     | Chl             | -                    | 0.38-0.43              | 0.04-0.50                 | 0.28       | 0.31*-0.38                     |
| RMSE                | PO <sub>4</sub> | 0.29-0.43            | 0.19-0.33              | -                         | 0.37       | 0.20*-0.31                     |
|                     | NO <sub>3</sub> | 0.33-0.68            | 1.64-5.50              | -                         | 4.25       | 2.49*-3.13                     |
|                     | Chl             | -                    | 0.16-0.18              | -                         | 0.16       | 0.14-0.28*                     |
| $\sigma_m/\sigma_o$ | PO <sub>4</sub> | 0.75-0.94            | -                      | -                         | 0.87       | 1.00-1.05                      |
|                     | NO <sub>3</sub> | 0.78-0.94            | -                      | 0.95-1.21                 | 0.85       | 0.97*-1.03                     |
|                     | Chl             | -                    | -                      | 0.40-2.65                 | 0.53       | 0.43-0.91*                     |
| Bias                | PO <sub>4</sub> | -                    | -0.32-(-0.03)          | -                         | -0.27      | -0.21-0.06*                    |
|                     | NO <sub>3</sub> | -                    | -1.3-4.9               | -                         | -2.35      | -1.29-0.33*                    |
|                     | Chl             | -                    | -0.12-(-0.07)          | -                         | 0.06       | -0.01-0.23*                    |
| Bias (rel.)         | PO <sub>4</sub> | -27.2-(-5.1)         | -                      | -                         | -42.2      | -32.9-10.1*                    |
|                     | NO <sub>3</sub> | -3.0-8.5             | -                      | -                         | -33.7      | -18.6-4.8*                     |

**Table S4.** Global average oxygen ( $\text{mmol O}_2\text{m}^{-3}$ ), global OMZ volume ( $\times 10^6\text{km}^3$ ; OMZ defined by  $\text{O}_2 \leq 50\text{mmol m}^{-3}$ ) and global biogeochemical fluxes ( $\text{Pg C y}^{-1}$ ) of this study (range optimised), of ECCO\*, from observed estimates, and selected global model publications. Observations: Garcia et al. (2006b,  $\text{O}_2$  and OMZ volume), Carr et al. (2006, primary production), Steinberg and Landry (2017, grazing by micro- and mesozooplankton, assuming one trophic level between both), Henson et al. (2012, min. export production and max. flux in 2000m), Dunne et al. (2007, max. export production and min. flux in 2000m).

|                         | ave. $\text{O}_2$ | OMZ Vol.  | Prim. Prod. | Grazing   | Export ( $\approx 100\text{m}$ ) | Flux (2000m) | No. of experiments |
|-------------------------|-------------------|-----------|-------------|-----------|----------------------------------|--------------|--------------------|
| Observations            | 174               | 56.7      | 40-60       | 37.3-42.5 | 4.0-9.6                          | 0.20-0.66    |                    |
| Range optimised.        | 161-198           | 39.3-87.1 | 24.1-50.0   | 14.8-30.3 | 6.0-6.9                          | 0.19-0.77    | 6                  |
| ECCO*                   | 174               | 33.4      | 44.7        | 28.6      | 7.3                              | 0.29         | 1                  |
| Keller et al. (2012)    |                   |           | 52-54       |           | 7.0-7.1                          | 0.35-0.36    | 2                  |
| Bopp et al. (2013)      | 136-231           | 12.5-225  | 30.9-78.7   |           | 4.9-8.1                          |              | 10                 |
| Dunne et al. (2013)     |                   |           | 68-82       |           | 5.4-8.0                          |              | 2                  |
| Ilyina et al. (2013)    |                   |           | 55.8-61.6   |           | 8.2-9.1                          |              | 3                  |
| Moore et al. (2013)     |                   |           | 55.6        |           | 8.1                              |              | 1                  |
| Seferian et al. (2013)  |                   |           | 25.3-34.0   |           | 4.9-7.9                          |              | 3                  |
| Yool et al. (2013)      |                   |           | 41.6        |           |                                  |              | 1                  |
| Lima et al. (2014)      |                   |           |             |           | 6.0                              | 0.21         | 1                  |
| Stock et al. (2014)     |                   |           | 51.9        | 37.4      | 6.3                              |              | 1                  |
| Aumont et al. (2015)    |                   |           | 44.3        | 39.8      | 7.3                              |              | 1                  |
| Kvale et al. (2015)     |                   |           | 61.8-64.2   |           | 7.1-7.8                          | 0.26-0.36    | 2                  |
| Le Quere et al. (2016)  |                   |           | 42.6        |           | 7.6                              |              | 1                  |
| Schwinger et al. (2016) |                   |           | 28.4-30.4   |           | 4.0-5.6                          | 0.16-0.69    | 4                  |
| Aumont et al. (2017)    |                   |           | 41-52       |           | 8.1-9.0                          | 0.56-0.81    | 2                  |
| Seferian et al. (2020)  |                   |           | 15.1-81.9   |           | 2.4-11.9                         |              | CMIP5              |
| Seferian et al. (2020)  |                   |           | 21.6-57.3   |           | 4.9-10.4                         |              | CMIP6              |
| Stock et al. (2020)     |                   |           | 51.1        |           | 6.3.                             | 0.43         | 1                  |

**Table S5.** Range of different global model diagnostics of inter-model spread due to model parameter set (after 10 and 3000 years of simulation;  $\Delta$  Parameter) and between 10 and 3000 years ( $\Delta$  Time), with range of other global models ( $\Delta$  GCMs; see Table S4) and observations ( $\Delta$  Obs; see Table S4). Values in parentheses show range when setup S4-Org is omitted from the analysis. All ranges are expressed as percent of the mean over the respective axis (i.e. mean over all model set-ups or over the two time slices).

| Diagnostic             | $\Delta$ Parameters |          |           |          | $\Delta$ Time |                | $\Delta$ GCMs | $\Delta$ Obs |
|------------------------|---------------------|----------|-----------|----------|---------------|----------------|---------------|--------------|
|                        | at t=10             |          | at t=3000 |          | t=3000 - t=10 |                |               |              |
| $J_{\text{RMSE}}$      | 13.6                | ( 1.6 )  | 24.0      | ( 2.6 )  | 3.1 - 12.9    | ( 3.1 - 5.1 )  |               |              |
| PP                     | 46.3                | ( 20.4 ) | 81.9      | ( 22.3 ) | 0.4 - 18.1    | ( 0.4 - 11.4 ) | 141.0         | 40.0         |
| Grazing                | 35.5                | ( 23.0 ) | 78.7      | ( 24.8 ) | 1.8 - 22.2    | ( 1.8 - 14.7 ) |               | 13.0         |
| EP                     | 26.7                | ( 20.9 ) | 14.0      | ( 13.2 ) | 0.6 - 19.0    | ( 0.6 - 12.0 ) | 135.0         | 94.0         |
| F2000                  | 140.5               | ( 56.2 ) | 106.1     | ( 32.5 ) | 2.5 - 60.3    | ( 2.5 - 14.6 ) | 147.0         | 113.0        |
| average O <sub>2</sub> | 0.6                 | ( 0.2 )  | 21.8      | ( 7.6 )  | 1.1 - 11.9    | ( 1.1 - 8.5 )  | 53.4          |              |
| OMZ volume             | 11.9                | ( 4.0 )  | 79.2      | ( 76.6 ) | 2.1 - 48.0    | ( 2.1 - 48.0 ) | 239.0         |              |

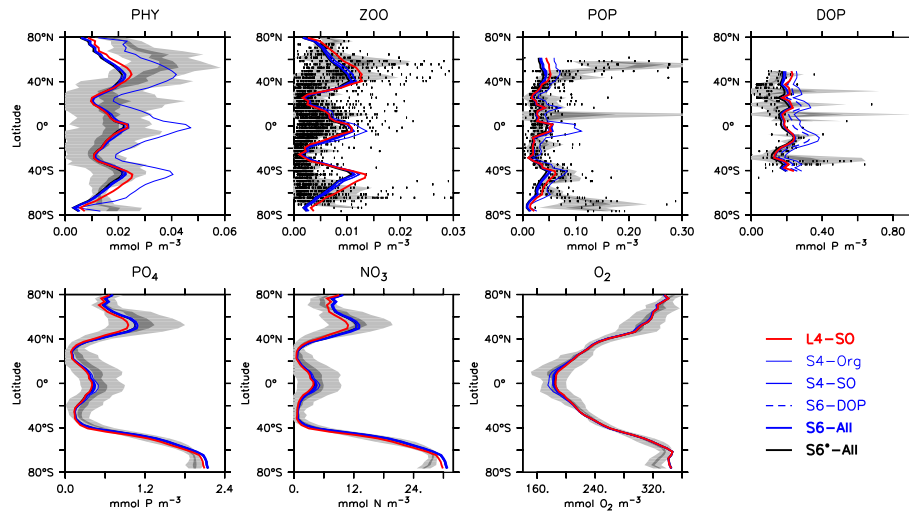

**Figure S1.** Zonally averaged tracer distributions of model simulations after spin up of 10 years (coloured lines, see legend on the lower right) and observations (light and dark grey shaded areas: one and 1/5 standard deviation around the mean, black symbols: individual data points). All concentrations have been averaged over the upper 100 m, except for phytoplankton (upper 10 m).

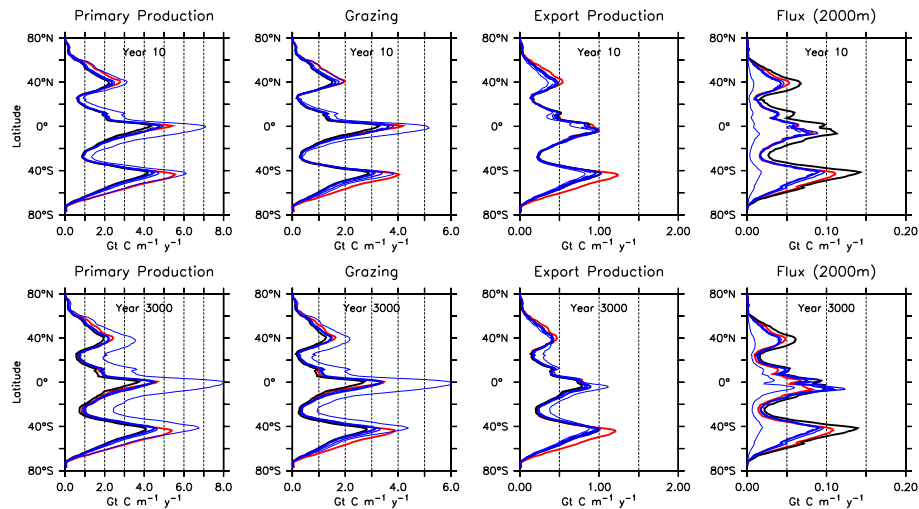

**Figure S2.** Zonally integrated fluxes of primary production, grazing, export production and particle flux in 2000 m after spin up of 10 years (top panels) and 3000 years (bottom panels). Line colours as in Figure S1.

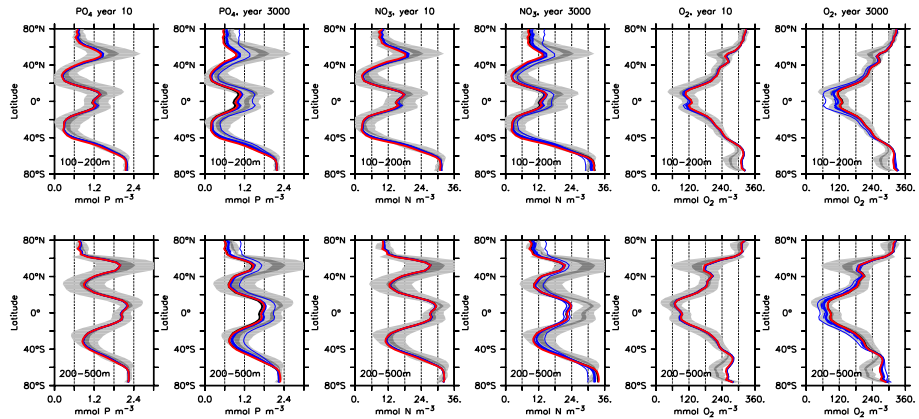

**Figure S3.** Zonally averaged inorganic tracer distributions of model simulations after spin up of 10 and 3000 years (coloured lines) and observations (light and dark grey shaded areas), averaged over the 100-200 m (upper panels) and 200-500 m (lower panels). Line and shade colours as in Figure S1

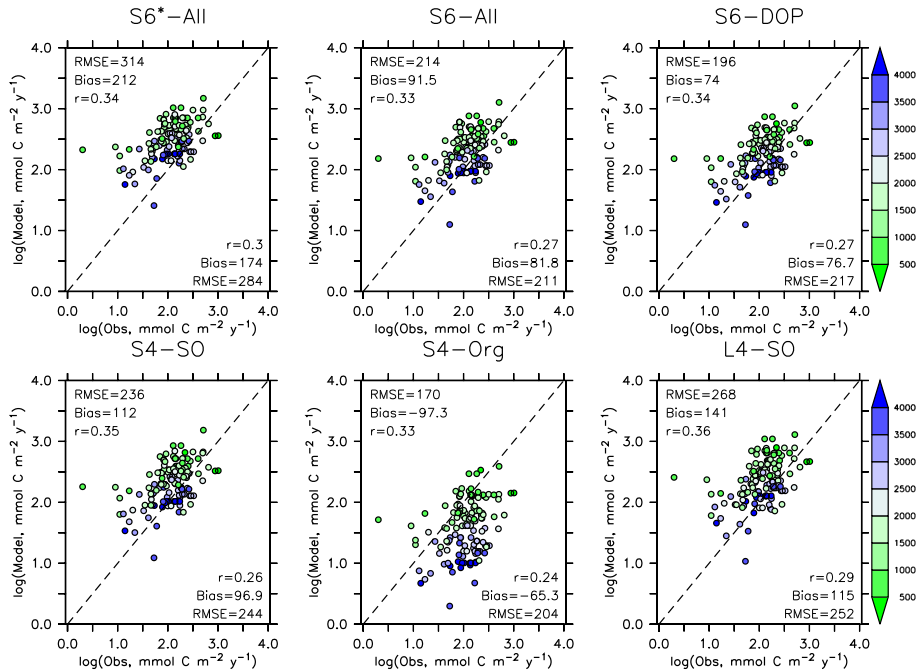

**Figure S4.** Simulated particle flux after a spin up of 10 years plotted against observations by Honjo et al. (2008). Both model and observations are log-transformed. Colour indicates trap depth. Numbers in upper left corner denote RMSE, bias and correlation coefficient after 10 years, calculated from non-transformed data. Numbers in lower right panels denote metrics after 3000 years.



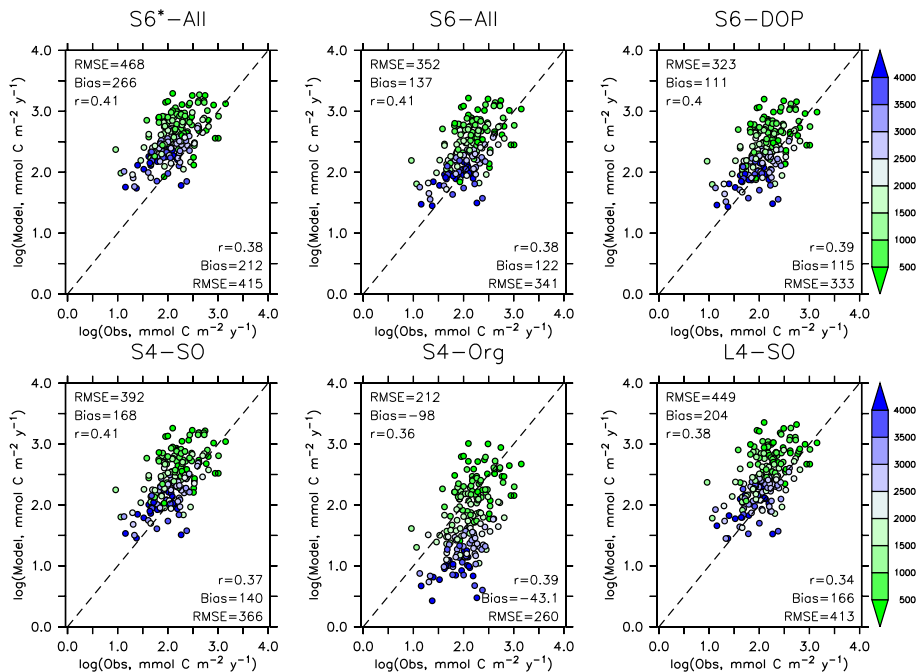

Figure S5. As Figure S4, but for comparison with data set by Lutz et al. (2007).

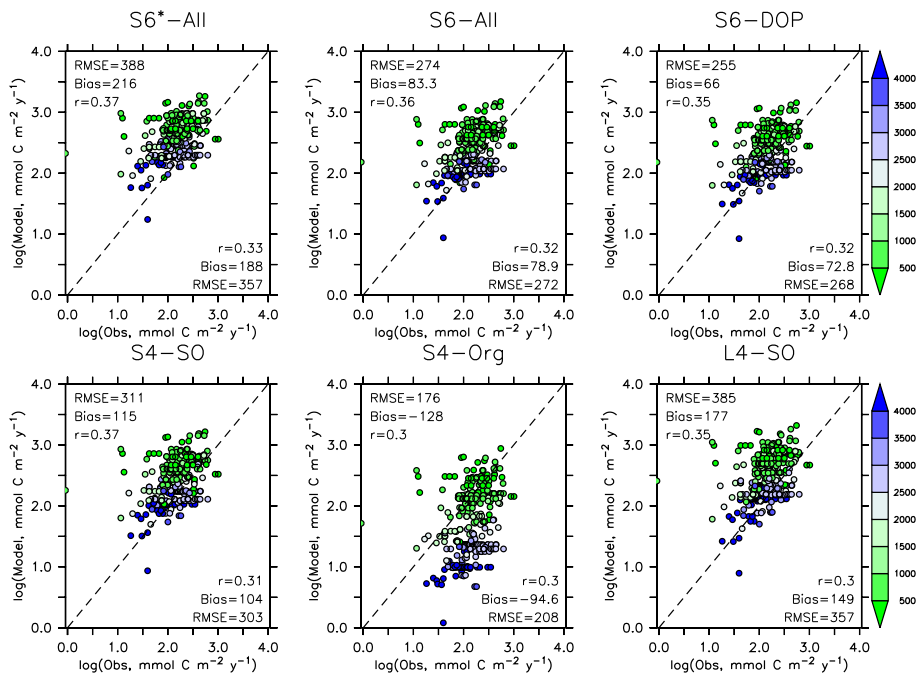

Figure S6. As Figure S4, but for comparison with data set by Mouw et al. (2016).

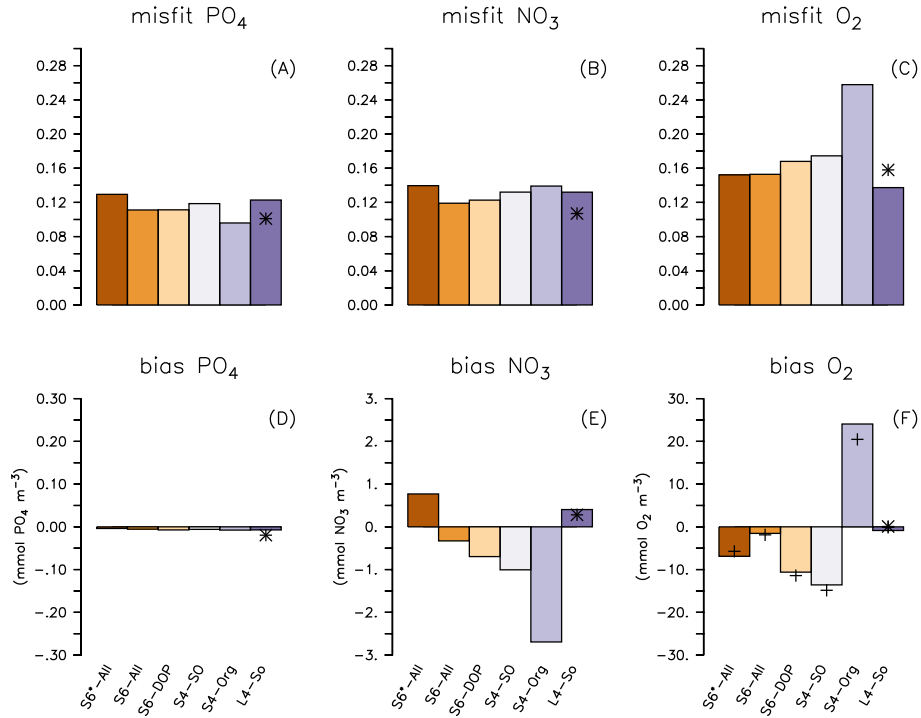

**Figure S7.** Misfit (panels A-C) and bias (mmol m<sup>-3</sup>; panels D-F) of phosphate (A, D), nitrate (B, E) and oxygen (C, F), calculated over the entire model domain after a spin up of 3000 years. A star indicates the performance of ECCO\* by Krist et al. (2020). Pluses in panel F denote the total oxidant bias for oxic and suboxic remineralisation, calculated from  $B_{O_2} + (B_{NO_3} - 16B_{PO_4}) \frac{R_{-O_2:P}}{0.8R_{-O_2:P} - 16}$ , where  $B_X$  is the bias of the respective tracer and 16 mol N:mol P is the N:P stoichiometry of organic matter.

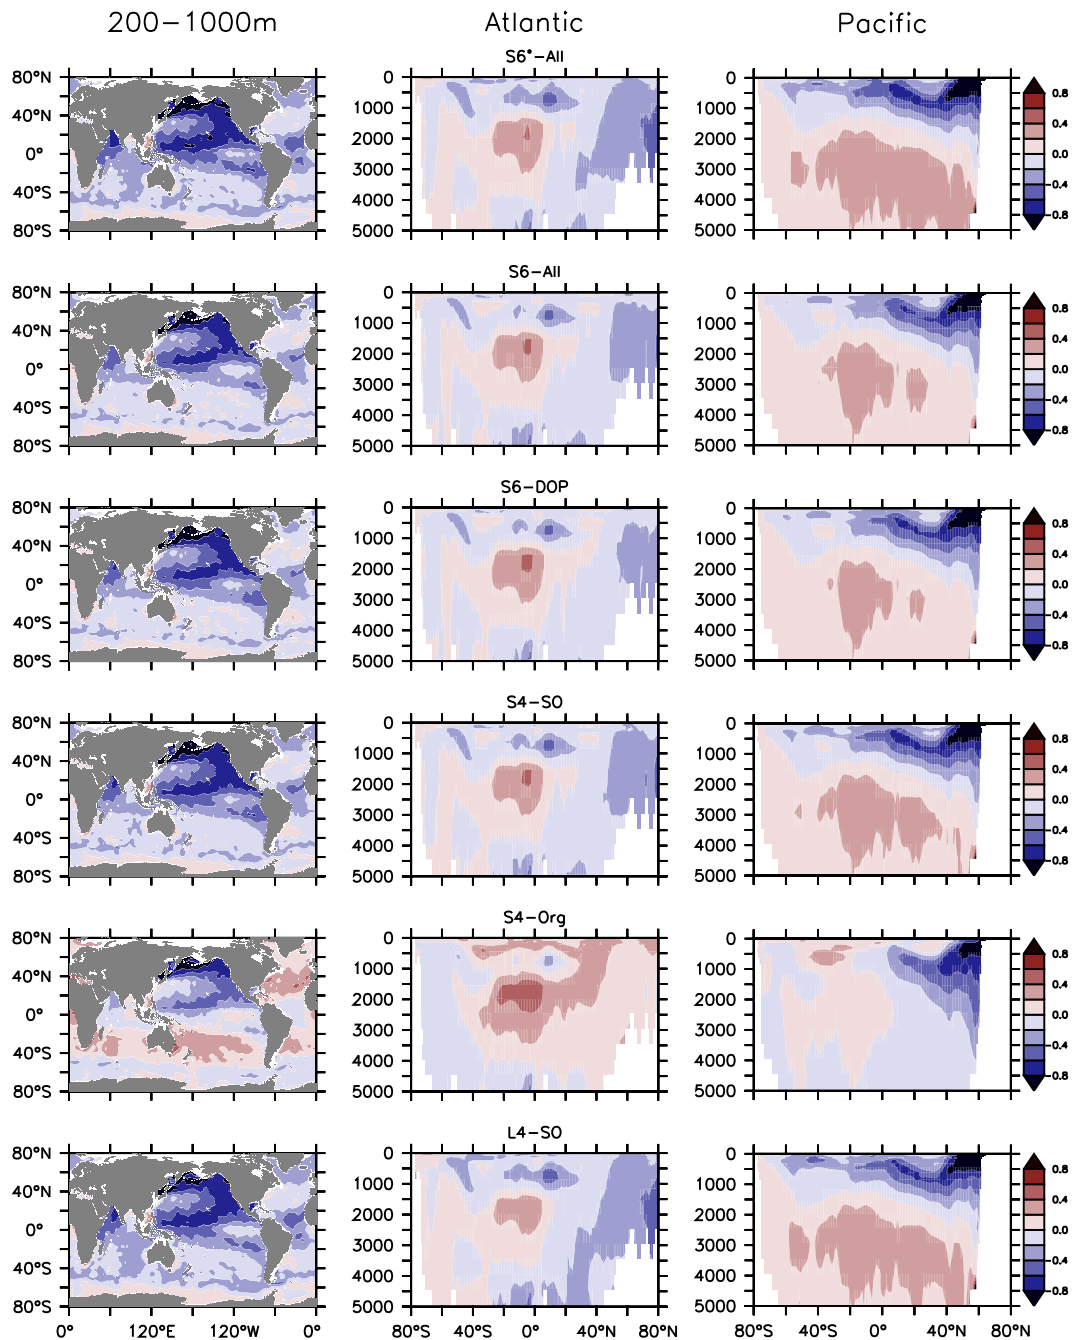

**Figure S8.** Deviation of model results from observations for phosphate after 3000 years. Left panels: deviations of average between 200 and 1000 m. Middle panels: deviations of Atlantic zonal means. Right panels: deviation of Pacific zonal means.

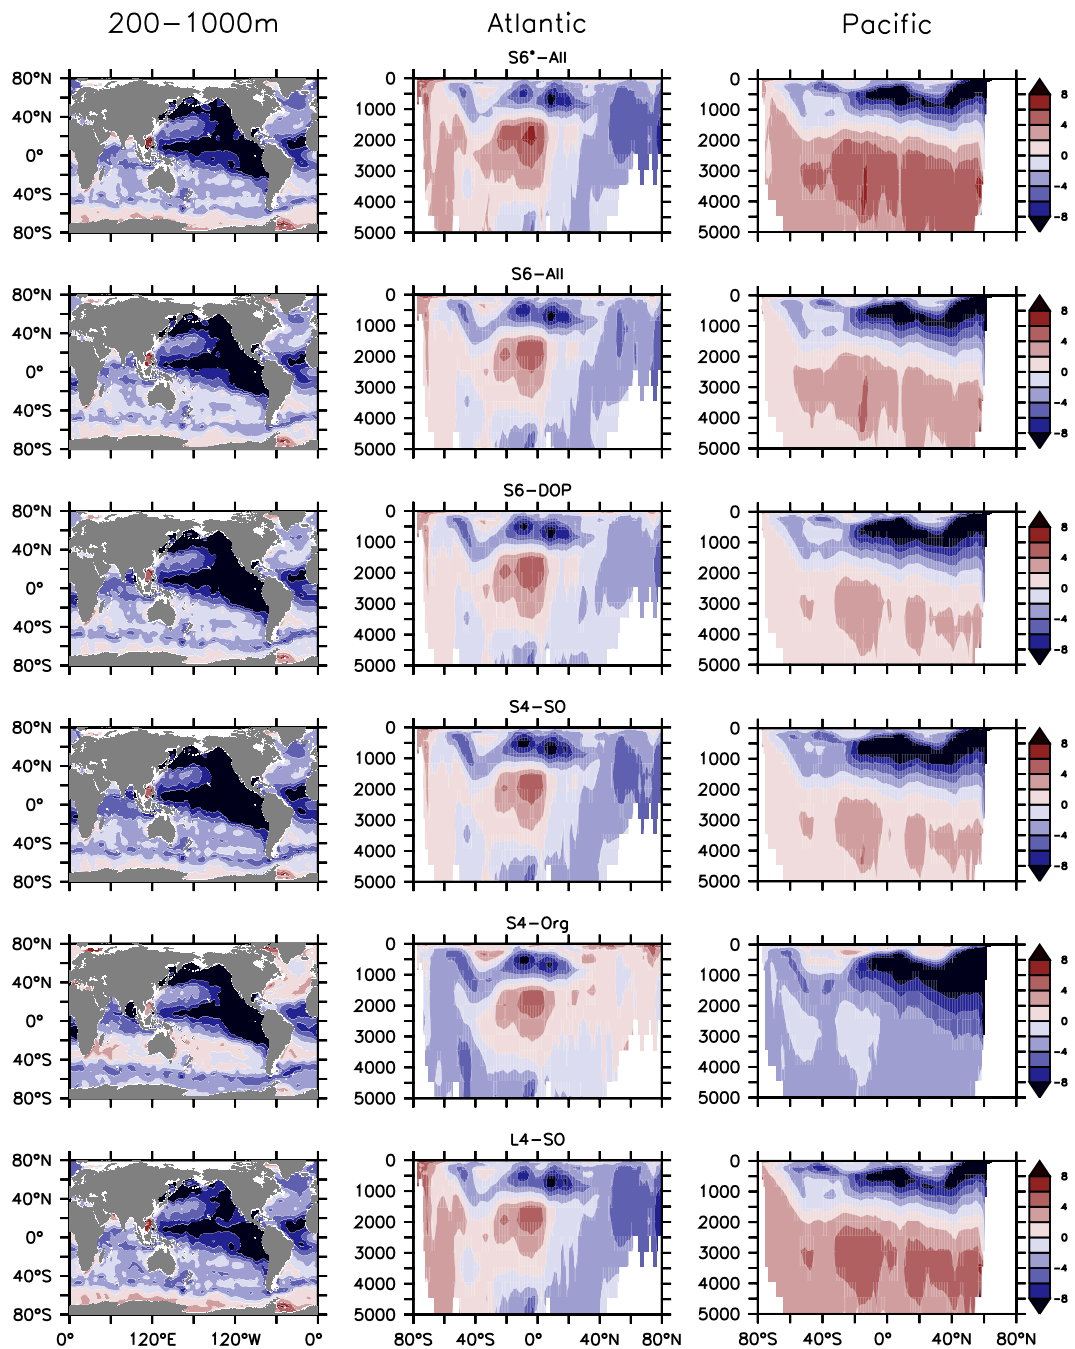

Figure S9. As Figure S8 but for nitrate.

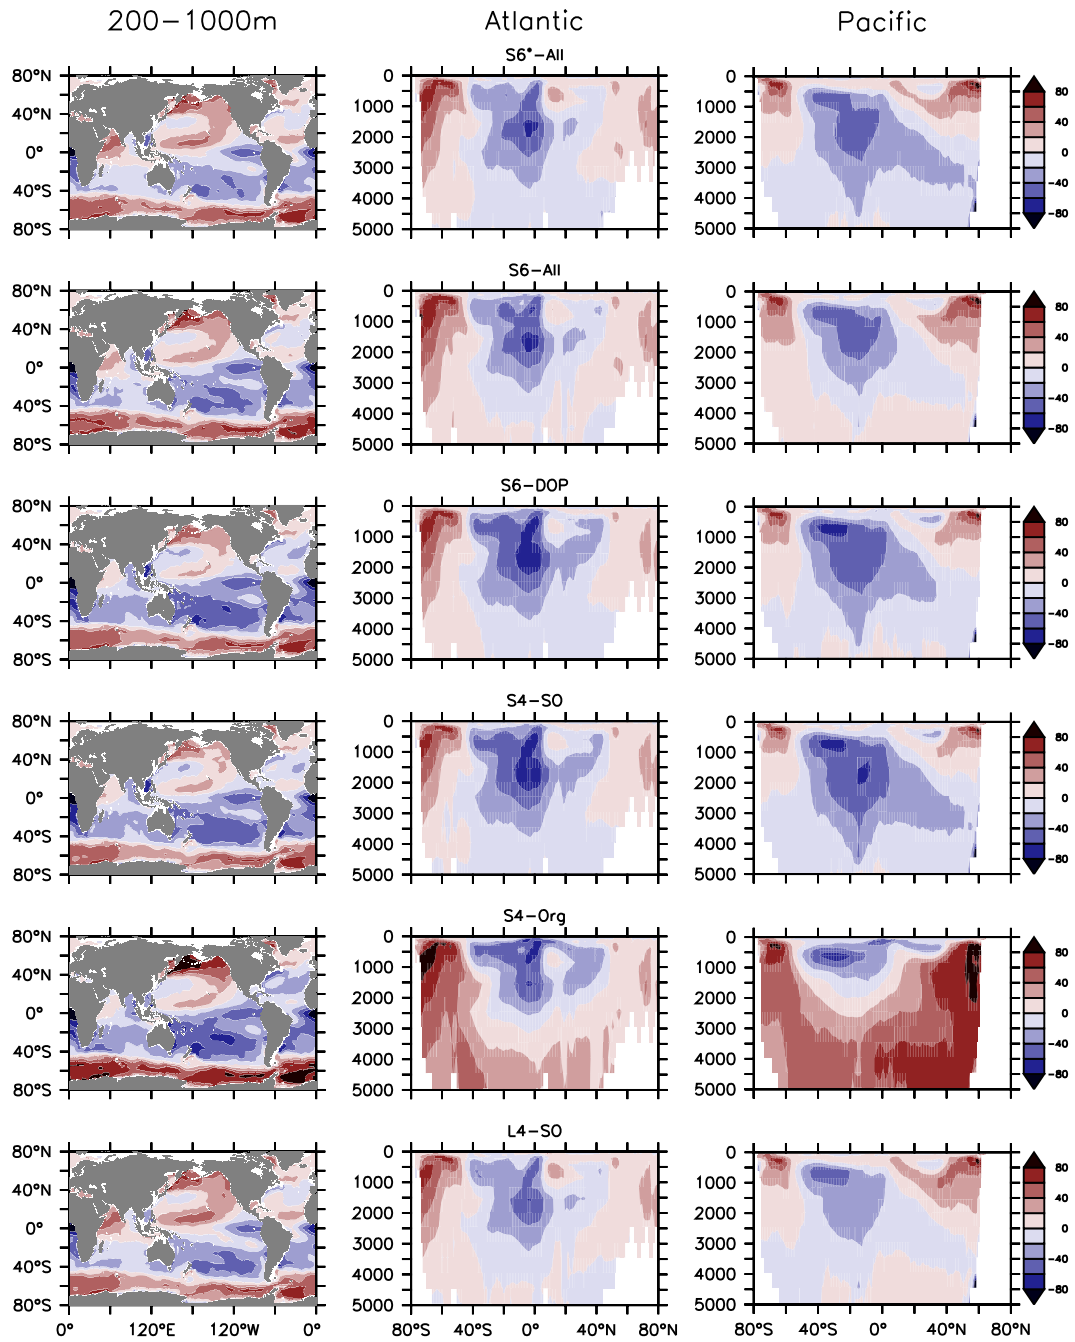

Figure S10. As Figure S8 but for oxygen.

## References

- Aumont, O., Ethe, C., Tagliabue, A., Bopp, L., and Gehlen, M.: PISCES-v2: an ocean biogeochemical model for carbon and ecosystem studies, *Geosci. Model Dev.*, 8, 2465–2513, <https://doi.org/10.5194/gmd-8-2465-2015>, 2015.
- Aumont, O., van Hulst, M., Roy-Barman, M., Dutay, J.-C., Ethe, C., and Gehlen, M.: Variable reactivity of particulate organic matter in a  
5 global ocean biogeochemical model, *Biogeosciences*, 14, 2321–2341, <https://doi.org/10.5194/bg-14-2321-2017>, 2017.
- Aumont, O., Maury, O., Lefort, S., and Bopp, L.: Evaluating the Potential Impacts of the Diurnal Vertical Migration by Marine Organisms on Marine Biogeochemistry, *Glob. Biogeochem. Cyc.*, 32, 1622–1643, <https://doi.org/10.1029/2018GB005886>, 2018.
- Bopp, L., Resplandy, L., Orr, J., Doney, S., Dunne, J., Gehlen, M., Halloran, P., Heinze, C., Ilyina, T., Seferian, R., Tjiputra, J., and Vichi, M.: Multiple stressors of ocean ecosystems in the 21st century: projections with CMIP5 models, *Biogeosciences*, 10, 6225–6245,  
10 <https://doi.org/10.5194/bg-10-6225-2013>, 2013.
- Carr, M.-E., Friedrichs, M., Schmeltz, M., Aitac, M., Antoine, D., Arrigo, K., Asanuma, I., Aumont, O., Barber, R., Behrenfeld, M., Bidigare, R., Buitenhuis, E., Campbell, J., Ciotti, A., Dierssen, H., Dowell, M., Dunne, J., Esaias, W., Gentili, B., Gregg, W., Groom, S., Hoepffner, N., Ishizaka, J., Kameda, T., Quere, C. L., Lohrenz, S., Marra, J., lino, F. M., Moore, K., Morel, A., Reddy, T., J.Ryan, Scardi, M., T.Smyth, Turpie, K., Tilstone, G., Waters, K., and Yamanaka, Y.: A comparison of global estimates of marine primary production from ocean color,  
15 *Deep-Sea Res. Pt. II*, 53, 741–770, <https://doi.org/10.1016/j.dsr2.2006.01.028>, 2006.
- Dunne, J. P., Sarmiento, J. L., and Gnanadesikan, A.: A synthesis of global particle export from the surface ocean and cycling through the ocean interior and on the seafloor, *Global Biogeochem. Cy.*, 21, <https://doi.org/10.1029/2006GB002907>, 2007.
- Dunne, J. P., John, J. G., Shevliakova, E., Stouffer, R. J., Krasting, J. P., Malyshev, S. L., Milly, P. C. D., Sentman, L. T., Adcroft, A. J., Cooke, W., Dunne, K. A., Griffies, S. M., Hallberg, R. W., Harrison, M. J., Levy, H., Wittenberg, A. T., Phillips, P. J., and Zadeh, N.:  
20 GFDL's ES2 Global Coupled Climate-Carbon Earth System Models. Part II: Carbon System Formulation and Baseline Simulation Characteristics, *J. Clim.*, 26, 2247–2267, <https://doi.org/10.1175/JCLI-D-12-00150.1>, 2013.
- Garcia, H. E., Locarnini, R. A., Boyer, T. P., and Antonov, J. I.: World Ocean Atlas 2005, Vol. 4: Nutrients (phosphate, nitrate, silicate), in: NOAA Atlas NESDIS 64, edited by Levitus, S., U.S. Government Printing Office, Wash.,D.C., 2006a.
- Garcia, H. E., Locarnini, R. A., Boyer, T. P., and Antonov, J. I.: World Ocean Atlas 2005, Vol. 3: Dissolved Oxygen, Apparent Oxygen  
25 Utilization, and Oxygen Saturation, in: NOAA Atlas NESDIS 63, edited by Levitus, S., U.S. Government Printing Office, Wash.,D.C., 2006b.
- Henson, S. A., Sanders, R., and Madsen, E.: Global patterns in efficiency of particulate organic carbon export and transfer to the deep ocean, *Global Biogeochem. Cy.*, 26, GB1028, <https://doi.org/10.1029/2011GB004099>, 2012.
- Honjo, S., Manganini, S. J., Krishfield, R. A., and Francois, R.: Particulate organic carbon fluxes to the ocean interior and factors controlling the biological pump: A synthesis of global sediment trap programs since 1983, *Prog. Oceanogr.*, 76, 217–285,  
30 <https://doi.org/10.1016/j.pocean.2007.11.003>, 2008.
- Ilyina, T., Six, K., Segsneider, J., Maier-Reimer, E., Li, H., and nez Riboni, I. N.: Global ocean biogeochemistry model HAMOCC: Model architecture and performance as component of the MPI-Earth system model in different CMIP5 experimental realizations, *Jour. Adv. Model. Earth Systems*, 5, 1–29, <https://doi.org/10.1029/2012MS000178>, 2013.
- Keller, D., Oschlies, A., and Eby, M.: A new marine ecosystem model for the University of Victoria Earth System Climate Model, *Geosci. Model Dev.*, 5, 1195–1220, <https://doi.org/10.5194/gmd-5-1195-2012>, 2012.

- Kriest, I., Kähler, P., Koeve, W., Kvale, K., Sauerland, V., and Oschlies, A.: One size fits all? Calibrating an ocean biogeochemistry model for different circulations, *Biogeosciences*, 17, 3057–3082, <https://doi.org/10.5194/bg-17-3057-2020>, 2020.
- Kvale, K. F., Meissner, K. J., Keller, D. P., Eby, M., and Schmittner, A.: Explicit Planktic Calcifiers in the University of Victoria Earth System Climate Model, Version 2.9, *Atmosphere-Ocean*, 53, 332–350, <https://doi.org/10.1080/07055900.2015.1049112>, 2015.
- 40 Kwiatkowski, L., Yool, A., Allen, J. I., Anderson, T. R., Barciela, R., Buitenhuis, E. T., Butenschoten, M., Enright, C., Halloran, P. R., Le Quere, C., de Mora, L., Racault, M. F., Sinha, B., Totterdell, I. J., and Cox, P. M.: iMarNet: an ocean biogeochemistry model inter-comparison project within a common physical ocean modelling framework, *Biogeosciences*, 11, 7291–7304, <https://doi.org/10.5194/bg-11-7291-2014>, 2014.
- 45 Lima, I. D., Lam, P. J., and Doney, S. C.: Dynamics of particulate organic carbon flux in a global ocean model, *Biogeosciences*, 11, 1177–1198, <https://doi.org/10.5194/bg-11-1177-2014>, 2014.
- Le Quere, C., Buitenhuis, E. T., Moriarty, R., Alvain, S., Aumont, O., Bopp, L., Chollet, S., Enright, C., Franklin, D. J., Geider, R. J., Harrison, S. P., Hirst, A. G., Larsen, S., Legendre, L., Platt, T., Prentice, I. C., Rivkin, R. B., Saille, S., Sathyendranath, S., Stephens, N., Vogt, M., and Vallina, S. M.: Role of zooplankton dynamics for Southern Ocean phytoplankton biomass and global biogeochemical cycles, *Biogeosciences*, 13, 4111–4133, <https://doi.org/10.5194/bg-13-4111-2016>, 2016.
- 50 Lutz, M., Caldeira, K., Dunbar, R., and Behrenfeld, M. J.: Seasonal rhythms of net primary production and particulate organic carbon flux to depth describe biological pump efficiency in the global ocean, *J. Geophys. Res.*, 113, C10011, <https://doi.org/10.1029/2006JC003706>, 2007.
- Moore, J. K., Lindsay, K., Doney, S. C., Long, M. C., and Misumi, K.: Marine Ecosystem Dynamics and Biogeochemical Cycling in the Community Earth System Model [CESM1(BGC)]: Comparison of the 1990s with the 2090s under the RCP4.5 and RCP8.5 Scenarios, *J. Clim.*, 26, 9291–9312, <https://doi.org/10.1175/JCLI-D-12-00566.1>, 2013.
- 55 Mouw, C. B., Barnett, A., McKinley, G. A., Gloege, L., and Pilcher, D.: Global ocean particulate organic carbon flux merged with satellite parameters, *Earth Sys. Sci. Data*, 8, 531–541, <https://doi.org/10.5194/essd-8-531-2016>, 2016.
- Schwinger, J., Goris, N., Tjiputra, J., Kriest, I., Bentsen, M., Bethke, I., Ilicak, M., Assmann, K., and Heinze, C.: Evaluation of NorESM-OC (versions 1 and 1.2), the ocean carbon-cycle stand-alone configuration of the Norwegian Earth System Model (NorESM1), *Geosci. Model Dev.*, 9, 2589–2622, <https://doi.org/10.5194/gmd-9-2589-2016>, 2016.
- 60 Seferian, R., Bopp, L., Gehlen, M., Orr, J., Ethe, C., Cadule, P., Aumont, O., Salas y Melia, D., Voltaire, A., and Madec, G.: Skill assessment of three earth system models with common marine biogeochemistry, *Clim. Dyn.*, 40, 2549–2573, <https://doi.org/10.1007/s00382-012-1362-8>, 2013.
- 65 Seferian, R., Berthet, S., Yool, A., Palmieri, J., Bopp, L., Tagliabue, A., Kwiatkowski, L., Aumont, O., Christian, J., Dunne, J., Gehlen, M., Ilyina, T., John, J. G., Li, H., Long, M. C., Luo, J. Y., Nakano, H., Romanou, A., Schwinger, J., Stock, C., Santana-Falcón, Y., Takano, Y., Tjiputra, J., Tsujino, H., Watanabe, M., Wu, T., Wu, F., and Yamamoto, A.: Tracking Improvement in Simulated Marine Biogeochemistry Between CMIP5 and CMIP6, *Current Climate Change Reports*, 6, 95–119, <https://doi.org/10.1007/s40641-020-00160-0>, 2020.
- Steinberg, D. K. and Landry, M. R.: Zooplankton and the Ocean Carbon Cycle, *Annual Review of Marine Science*, 9, 413–444, <https://doi.org/10.1146/annurev-marine-010814-015924>, 2017.
- 70 Stock, C., Dunne, J., and John, J.: Global-scale carbon and energy flows through the marine planktonic food web: An analysis with a coupled physical–biological model, *Prog. Oceanogr.*, 120, 1–28, <https://doi.org/10.1016/j.pocean.2013.07.001>, 2014.

- 75 Stock, C. A., Dunne, J. P., Fan, S., Ginoux, P., John, J., Krasting, J. P., Laufkötter, C., Paulot, F., and Zadeh, N.: Ocean biogeochemistry in GFDL's Earth System Model 4.1 and its response to increasing atmospheric CO<sub>2</sub>, *Jour. Adv. Model. Earth Systems*, 12, <https://doi.org/10.1029/2019MS002043>, 2020.
- Yool, A., Popova, E. E., and Anderson, T. R.: MEDUSA-2.0: an intermediate complexity biogeochemical model of the marine carbon cycle for climate change and ocean acidification studies, *Geosci. Model Dev.*, 6, 1767–1811, <https://doi.org/10.5194/gmd-6-1767-2013>, 2013.
